# Supplementary material for: Hellebrigenin anti-pancreatic cancer effects based on apoptosis and autophage
Source: PeerJ. 2020 May 8;8:e9011. doi: 10.7717/peerj.9011 (PMC7213012; doi:10.7717/peerj.9011)
Supplement: Supplemental Information 1 [file peerj-08-9011-s001.xlsx]

## Sheet: Sheet1
sample	concentration	caspase-3	cleaved caspase 3	caspase-7	cleaved-caspase-7	caspase-9	cleaved caspase 9	parp	cleaved parp	GAPDH		concentration	caspase-3	cleaved caspase 3	caspase-7	cleaved-caspase-7	caspase-9	cleaved caspase 9	parp	cleaved parp
1-SW1990	0	7576.83	6081.36	5939.05	5281.91	2497.69	25484.8	10971.1	6876.73	6276.47		0	1.20718	0.968914	0.946241	0.841543	0.397945	4.06037	1.74797	1.09564
5-SW1990	30 nM	11076	9453.04	6605.42	14671	3730.18	29317.4	11251.6	7526.87	11550.2		30 nM	0.958947	0.818431	0.571888	1.2702	0.322953	2.53826	0.974146	0.651666
4-SW1990	60 nM	10651.9	11628.2	10096.4	22407.9	8048.9	40984.9	19703.6	5968.51	14915.2		60 nM	0.714163	0.77962	0.676922	1.50235	0.539644	2.74786	1.32104	0.400162
2-SW1990	120 nM	8188.66	4586.85	5905.18	16603.7	1782.91	40808.8	9882.9	7756.56	5447.05		120 nM	1.50332	0.84208	1.0841	3.0482	0.327317	7.49191	1.81436	1.42399
8-SW1990	0	13335.1	36615.6	7220.42	1503.67	4140.18	25484.6	11021.4	4939.66	8983.95		0	1.48433	4.07567	0.803702	0.167373	0.460841	2.83668	1.22679	0.549831
7-SW1990DE	24 nM	14036.1	9906.36	5720.88	3616.25	4868.42	18246.2	12935	3389.88	8270.83		24 nM	1.69707	1.19775	0.691694	0.437229	0.588625	2.20609	1.56394	0.40986
6-SW1990DE	48 nM	12201.9	9071.66	6094.59	6795.39	4221.3	19219.1	14841.5	6572.95	6127.18		48 nM	1.99143	1.48056	0.994682	1.10906	0.688947	3.1367	2.42224	1.07275
3-SW1990DE	96 nM	6356.12	12601.7	7614.42	7945.4	4019.18	36250.8	16521.3	7318.63	9540.37		96 nM	0.666235	1.32088	0.798126	0.832819	0.421281	3.79973	1.73173	0.767123
9-PC3	0	15534.2	12896.1	16763.7	6818.3	13521.7	25269.1	9845.25	8995.85	11015.1		0	1.41027	1.17077	1.52189	0.618997	1.22757	2.29405	0.893797	0.816686
12-PC3DE	30 nM	13403.1	23340.7	14898	7541.71	12146.2	15131.7	6379.81	5933.05	14709.4		30 nM	0.911197	1.58679	1.01282	0.512714	0.825744	1.02871	0.433724	0.403352
11-PC3DE	60 nM	15461.3	4878.28	14869.7	13051.2	14314.7	21564.3	6331.4	6243.18	9330.42		60 nM	1.65708	0.522836	1.59368	1.39878	1.5342	2.31118	0.678576	0.669121
10-PC3DE	120 nM	14579.2	8424.15	17501.4	11095.4	14343.1	21069.6	3936.74	9775.15	14015.3		120 nM	1.04024	0.60107	1.24874	0.791668	1.02339	1.50333	0.280889	0.697464
		caspase-3	cleaved-caspase-3	caspase-7	cleaved-caspase-7	caspase-9	cleaved-caspase-9	parp	cleaved-parp	GAPDH
1-sw1990	0	16268.9	466.021	18258.7	5281.91	6505.41	15840.1	13128.3	6152.66	14080.8		0	1.1554	0.0330962	1.29671	0.375115	0.462006	1.12494	0.932357	0.436954
5-sw1990	30 nM	14907.4	4147.95	20494	14671	12110.3	19405	7646.78	8171.97	18346.4		30 nM	0.81255	0.226091	1.11706	0.799666	0.660089	1.0577	0.4168	0.445426
4-sw1990	60 nM	14161.9	19397.6	21029.6	22407.9	11118	10357.3	8942.61	10919.9	16895.4		60 nM	0.83821	1.1481	1.24469	1.32627	0.65805	0.613022	0.529292	0.646322
2-sw1990	120 nM	14889.9	15288	32514.5	16603.7	7421.73	11635.3	10193.1	8125.68	18254		120 nM	0.815704	0.837515	1.78122	0.909591	0.40658	0.63741	0.558405	0.445144
8-sw1990	0	13526.3	1553.96	15069.8	1503.67	9450.5	16999.6	7852.49	10731.5	13034.1		0	1.03776	0.119223	1.15618	0.115364	0.72506	1.30424	0.602458	0.823341
7-sw1990DE	24 nM	13194.7	7124.87	18445.4	3616.25	8069.38	13839.4	5080	7826.97	17043.6		24 nM	0.774176	0.418039	1.08225	0.212176	0.473456	0.812	0.29806	0.459233
6-sw1990DE	48 nM	12150.9	15855.8	43806.8	6795.39	8162.53	14429.3	7395.61	8551.56	17182.8		48 nM	0.707157	0.922772	2.54945	0.395476	0.47504	0.839753	0.430407	0.497681
3-sw1990DE	96 nM	17164.9	1420.41	43805.9	7945.4	10991.2	20007.8	9918.15	14310.1	18348.1		96 nM	0.935514	0.0774143	2.38749	0.433036	0.599035	1.09046	0.540554	0.77992
1-PC3	0	12084.4	9429.85	12541.7	6818.3	6450.75	22746.4	7596.02	3184.54	11903.9		0	1.01517	0.792168	1.05358	0.572781	0.541905	1.91084	0.638115	0.267522
4-PC3DE	30 nM	15084.2	13261.9	15234	7541.71	3226.42	16393.5	8841.27	4093.27	13912.5		30 nM	1.08422	0.953236	1.09499	0.542081	0.231908	1.17833	0.63549	0.294215
3-PC3DE	60 nM	15994.5	6567.05	13976.5	13051.2	12193.9	30420.4	6670.49	4850.25	11863.7		60 nM	1.34819	0.553542	1.17809	1.1001	1.02784	2.56416	0.562261	0.408831
2-PC3DE	120 nM	13576.6	16598.6	15024.3	11095.4	10577.5	19435.7	10393.7	1873.17	10520.6		120 nM	1.29049	1.57773	1.42809	1.05464	1.00541	1.8474	0.98794	0.178049
		Bax	bcl-2	p-bcl-2(s70)	p-bcl-2(t56)	bcl-xl	bcl-xl-1	mc1-1	GAPDH-1				Bax	bcl-2	p-bcl-2(s70)	p-bcl-2(t56)	bcl-xl	bcl-xl-1	mc1-1
1-SW1990	0	13389.2	1154.6	2194.38	3662.3	8973.48	20463.6	5793.52	16621			0	0.80556	0.0694663	0.132025	0.220342	0.539889	1.23119	0.348567
5-SW1990	30 nM	14137.3	9081.75	14917.9	15228.9	16259.6	25196.3	7797.93	14754.4			30 nM	0.958174	0.615527	1.01108	1.03216	1.10202	1.70771	0.528514
4-SW1990	60 nM	14831.6	15026.9	15334.1	17581.1	25607.5	34456.6	10363.1	19104.9			60 nM	0.776324	0.786544	0.802628	0.920241	1.34036	1.80354	0.542432
2-SW1990	120 nM	13036.8	5212.86	5659.93	5760.37	23572.5	31049.8	2864.79	11964.2			120 nM	1.08965	0.435705	0.473073	0.481467	1.97026	2.59522	0.239447
8-SW1990	0	14225.4	9570.49	10859.6	17405.1	14035.1	24140.3	6665.52	13692.4			0	1.03893	0.698962	0.79311	1.27115	1.02502	1.76304	0.486803
7-SW1990DE	24 nM	15542.6	9423.2	12405.4	19416.9	11758.1	22680.5	9304.3	13669.3			24 nM	1.13704	0.689368	0.907539	1.42047	0.860185	1.65923	0.68067
6-SW1990DE	48 nM	14727.4	9584.22	13404.3	20629	13939.2	23788.9	10024.6	14814			48 nM	0.994159	0.646971	0.904843	1.39254	0.940947	1.60584	0.676698
3-SW1990DE	96 nM	14683	11558.8	12472.6	13800.2	15945.8	27227	8221.59	18865.6			96 nM	0.778297	0.61269	0.661128	0.731501	0.845233	1.44321	0.435798
9-PC3	0	8918	497.506	9149.32	18675.6	10530.5	22375.9	11242.3	16074.8			0	0.554782	0.0309494	0.569171	1.16179	0.655092	1.39199	0.699374
12-PC3DE	30 nM	9726.59	50.536	2300.2	5575.95	8419	13607.4	13435.4	14662.5			30 nM	0.663365	0.00344662	0.156877	0.380287	0.574186	0.92804	0.916309
11-PC3DE	60 nM	10096.2	113.364	5385.93	11540	10747.6	18689.7	12859.7	14962.1			60 nM	0.674786	0.00757672	0.359971	0.771279	0.71832	1.24914	0.85948
10-PC3DE	120 nM	8929.59	505.042	3661.52	17134	10335	21406.7	11960	17336.1			120 nM	0.515087	0.0291324	0.211208	0.988343	0.596156	1.2348	0.689891
		PI3 p85	PI3 p110a	PI3 p110b	PI3 p110c	GAPDH-2							PI3 p85	PI3 p110a	PI3 p110b	PI3 p110c
1-SW1990	0	5110.38	12125	12873.6	16307.4	7225.47						0	0.707273	1.67809	1.78169	2.25694
5-SW1990	30 nM	4146.55	12661.6	15682.5	18932.4	13362						30 nM	0.310325	0.947585	1.17366	1.41689
4-SW1990	60 nM	9459.23	10075.7	21503.3	21425.4	18665.2						60 nM	0.506784	0.539809	1.15205	1.14788
2-SW1990	120 nM	2485.01	13210.7	13151.6	17345.4	11333.5						120 nM	0.219263	1.16563	1.16042	1.53046
8-SW1990	0	4666.62	13166.1	12123.3	13174.7	11404.5						0	0.409191	1.15446	1.06303	1.15522
7-SW1990DE	24 nM	5179.03	12517.2	13046.1	17868.1	13647.6						24 nM	0.379483	0.917171	0.955925	1.30925
6-SW1990DE	48 nM	3247.55	10490.2	12546	16791.6	15294.4						48 nM	0.212335	0.685886	0.820296	1.09789
3-SW1990DE	96 nM	5832.33	12745.5	16109.1	20662.5	12083.1						96 nM	0.482685	1.05482	1.33319	1.71003
9-PC3	0	593.577	13968.4	11139.1	14087	12603						0	0.0470982	1.10835	0.883852	1.11775
12-PC3DE	30 nM	342.213	14276.9	9947.08	5257.28	11560.8						30 nM	0.0296011	1.23493	0.860412	0.454749
11-PC3DE	60 nM	406.042	14888.6	12477.4	9698.54	13211.2						60 nM	0.0307347	1.12697	0.944459	0.734115
10-PC3DE	120 nM	986.698	15086.9	13398.8	8367	9107.88						120 nM	0.108335	1.65646	1.47112	0.918655
